# Supplementary material for: Molecular-level electrocatalytic CO2 reduction reaction mediated by single platinum atoms
Source: Royal Society of Chemistry journal article supplement (doi:10.1039/d1cp05189j), 2022-01-01
Supplement: d1cp05189j1.pdf [file d1cp05189j1.pdf]

### Supporting Materials for

#### Molecular-Level Electrocatalytic CO<sub>2</sub> Reduction Reaction Mediated by Single Platinum Atoms

Gaoxiang Liu<sup>[a]#</sup>, Isuru R. Ariyaratna<sup>[b]</sup>, Zhaoguo Zhu<sup>[a]</sup>, Sandra M. Ciborowski, Evangelos Miliordos<sup>[b]\*</sup>, Kit H. Bowen<sup>[a]\*</sup>

*[a] Department of Chemistry, Johns Hopkins University, 3400 N Charles St, Baltimore, MD, 21218 (USA) E-mail: kbowen@jhu.edu*

*[b] Department of Chemistry and Biochemistry, Auburn University, Auburn, AL, 36849 (USA) E-mail: ezm0048@auburn.edu*

*# Present Address: Advanced Bioimaging Center, Department of Molecular and Cell Biology, University of California, Berkeley, Barker Hall, Berkeley, CA, 94720 (USA).*

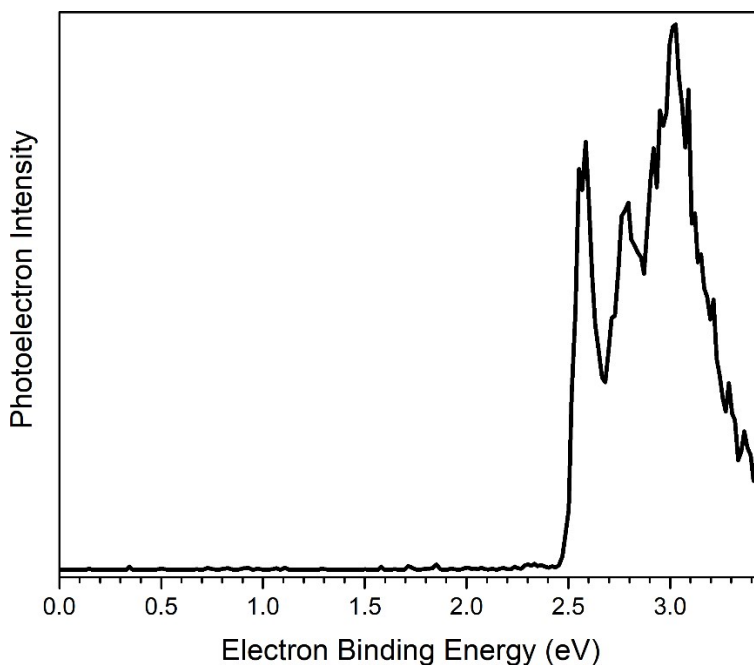

**Figure S1.** Photoelectron spectrum of H-Pt-OH.

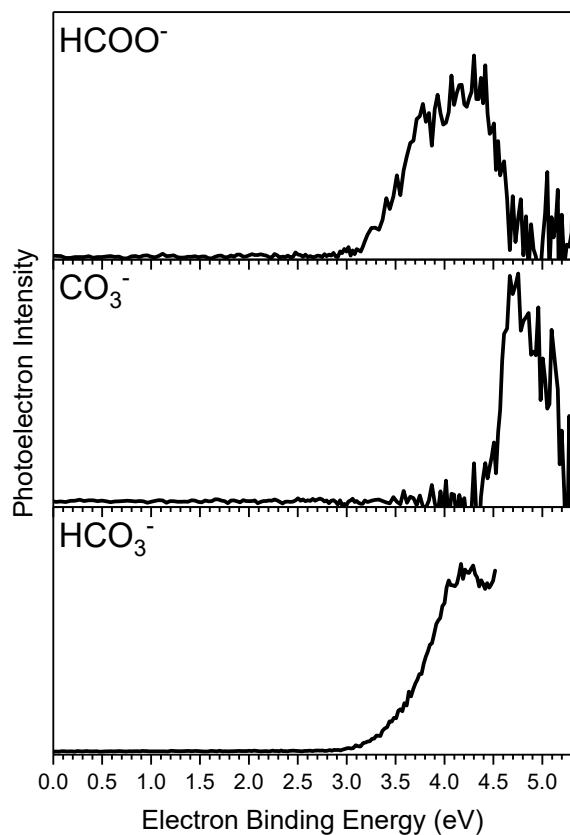

**Figure S2.** Photoelectron spectra of  $\text{HCOO}^-$  (formate),  $\text{CO}_3^-$ , and  $\text{HCO}_3^-$ .

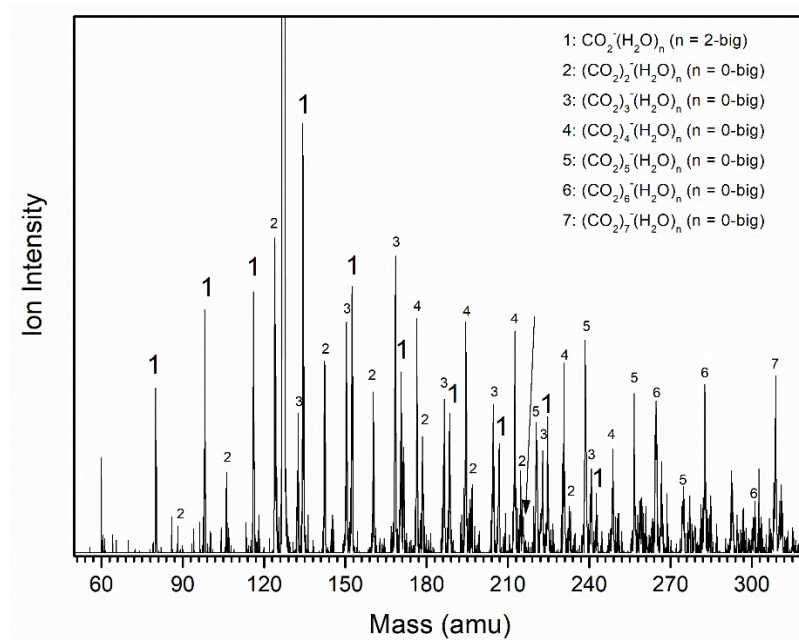

**Figure S3.** Mass spectrum of the reaction with  $\text{H}_2\text{O}$  and  $\text{CO}_2$  with the presence of electrons but not Pt atoms.

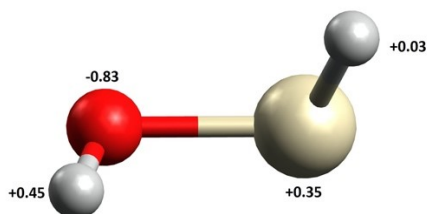

Figure S4. The NBO charge of neutral H-Pt-OH.

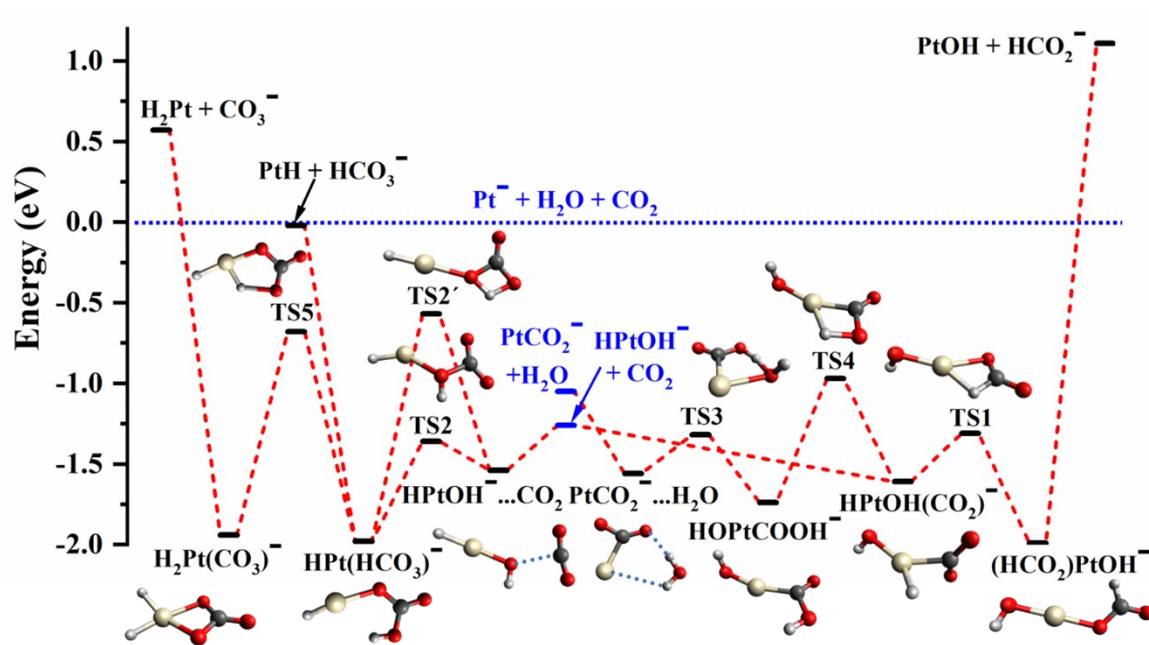

Figure S5. A more complete reaction profile for the reactions among Pt<sup>-</sup>, H<sub>2</sub>O, and CO<sub>2</sub>, showing the route where Pt<sup>-</sup> reacts first with CO<sub>2</sub> then with H<sub>2</sub>O.

Cartesian coordinates (Å) and harmonic vibrational frequencies (cm<sup>-1</sup>) for the B3LYP/aug-cc-pVTZ(C,H,O),aug-cc-pVTZ-PP(Pt) optimal structures of all intermediates.

HPtOH(CO<sub>2</sub>)<sup>-</sup>

|    |           |           |           |
|----|-----------|-----------|-----------|
| Pt | 0.328028  | -0.087693 | -0.127006 |
| H  | -0.375541 | -0.398881 | -1.489010 |
| H  | 2.693420  | -0.085919 | 0.672692  |
| O  | -1.951783 | -0.997008 | 0.577109  |

|   |           |          |           |
|---|-----------|----------|-----------|
| O | -2.287724 | 1.190271 | -0.026784 |
| C | -1.708200 | 0.142760 | 0.153585  |
| O | 2.032646  | 0.615274 | 0.674836  |

36.6558  
88.6876  
221.7544  
280.1340  
285.5807  
496.4301  
543.7175  
613.6168  
655.4146  
669.2542  
739.1893  
1207.2675  
1811.8834  
2203.6300  
3788.4606

**TS1**

|    |           |           |           |
|----|-----------|-----------|-----------|
| Pt | 0.381787  | -0.023357 | 0.012219  |
| H  | -1.132234 | -0.856499 | 0.402221  |
| H  | 2.692364  | 0.023453  | 0.689246  |
| O  | -1.639115 | 1.127305  | -0.024510 |
| O  | -3.083684 | -0.635810 | -0.084080 |
| C  | -2.014916 | -0.066116 | 0.055247  |
| O  | 2.316550  | -0.110051 | -0.188419 |

128.9783 i  
65.2992  
137.7860  
207.2410  
288.3067  
400.3065  
569.1082  
732.5334  
852.5105  
857.6339  
1246.2840  
1624.7104

1761.5238  
1800.6433  
3770.3542

**(HCO<sub>2</sub>)PtOH<sup>-</sup>**

|    |           |           |           |
|----|-----------|-----------|-----------|
| Pt | 0.462571  | -0.038755 | -0.000000 |
| H  | 2.823939  | -0.425876 | 0.000093  |
| O  | -3.628844 | 0.099236  | -0.000099 |
| O  | -1.477837 | -0.520593 | 0.000058  |
| H  | -2.096818 | 1.413829  | 0.000273  |
| C  | -2.435729 | 0.360633  | 0.000063  |
| O  | 2.332521  | 0.405248  | -0.000050 |

81.1213  
119.8144  
128.2613  
248.3714  
278.4213  
361.5135  
611.1560  
815.0375  
875.6847  
1054.8051  
1266.0252  
1387.4476  
1691.2431  
2896.9661  
3738.7550

**HPtOH<sup>-</sup>...CO<sub>2</sub>**

|    |           |           |           |
|----|-----------|-----------|-----------|
| O  | 3.038371  | 1.305696  | -0.036551 |
| C  | 3.239987  | 0.162674  | 0.028954  |
| O  | 3.660999  | -0.923513 | 0.108319  |
| O  | 0.913292  | -0.546550 | -0.155421 |
| H  | 0.934169  | -1.508116 | -0.098898 |
| H  | -2.354280 | 0.432850  | 0.757918  |
| Pt | -1.011809 | 0.018130  | -0.002096 |

26.1298  
47.1661

95.4493  
165.8615  
222.3338  
404.6783  
479.9023  
556.0099  
600.7484  
680.4730  
803.7136  
1348.2456  
2076.7419  
2350.8166  
3780.4926

**TS2**

|    |           |           |           |
|----|-----------|-----------|-----------|
| O  | 2.027626  | 1.310112  | 0.127327  |
| C  | 2.346286  | 0.142060  | 0.019413  |
| O  | 3.317948  | -0.528921 | -0.288810 |
| O  | 1.131945  | -0.783534 | 0.401023  |
| H  | 1.329102  | -1.641106 | 0.011125  |
| H  | -2.311916 | -0.497942 | 0.013458  |
| Pt | -0.832244 | 0.016736  | -0.026377 |

139.4999 i  
69.8138  
140.5831  
258.5191  
296.2755  
392.8941  
514.7363  
598.8210  
713.2081  
774.3419  
1086.7150  
1277.5810  
1884.6734  
2155.0015  
3814.8475

**HPt(HCO<sub>3</sub>)<sup>-</sup>**

|    |           |           |           |
|----|-----------|-----------|-----------|
| H  | 2.055972  | 0.705775  | 0.641355  |
| Pt | 0.811623  | -0.018342 | -0.015625 |
| O  | -2.007269 | 1.284115  | -0.003200 |
| H  | -1.039403 | 1.434073  | 0.003683  |
| O  | -3.310278 | -0.527374 | -0.021428 |
| O  | -1.086874 | -0.787756 | 0.084152  |
| C  | -2.181303 | -0.076838 | 0.016255  |

95.1234

148.6680

306.3841

328.0046

439.6829

605.0932

662.5970

698.2270

812.7066

981.2606

1189.0141

1366.0926

1745.1803

2133.8174

3466.7665

**PtCO<sub>2</sub><sup>-</sup>...H<sub>2</sub>O**

|    |           |           |           |
|----|-----------|-----------|-----------|
| H  | -2.793301 | -0.159058 | -0.000062 |
| O  | -3.179454 | -1.058870 | 0.000517  |
| H  | -2.387928 | -1.607869 | 0.000726  |
| O  | -1.770679 | 1.392769  | -0.000952 |
| Pt | 0.572771  | -0.319855 | -0.000053 |
| O  | 0.428788  | 2.050685  | 0.000952  |
| C  | -0.554025 | 1.273163  | -0.000104 |

27.7285

39.8080

175.0438

223.8021

227.5081

326.2730

387.4249

592.7848  
699.5048  
754.8146  
1213.8447  
1686.3021  
1735.9962  
3517.4206  
3815.4180

**TS3**

|    |           |           |           |
|----|-----------|-----------|-----------|
| H  | -0.862775 | 1.727224  | -0.047232 |
| O  | 0.359730  | 2.052381  | -0.075185 |
| H  | 0.610282  | 2.297067  | 0.821614  |
| O  | -1.860962 | 1.119084  | -0.033290 |
| Pt | 0.495622  | -0.253030 | -0.003061 |
| O  | -2.193682 | -1.109086 | 0.037077  |
| C  | -1.474455 | -0.131168 | 0.005924  |

854.7255 i  
98.0139  
283.7398  
292.8681  
313.1826  
563.6594  
582.8444  
600.2224  
621.6390  
883.2396  
1257.1140  
1457.4565  
1619.3782  
1734.4423  
3805.7697

**HOPtCOOH<sup>-</sup>**

|    |           |           |           |
|----|-----------|-----------|-----------|
| Pt | -0.350920 | -0.082470 | -0.005487 |
| O  | -2.278175 | 0.354459  | -0.078791 |
| O  | 2.372339  | -0.921679 | 0.025205  |
| H  | 1.737861  | -1.652438 | 0.030648  |
| H  | -2.571326 | 0.534769  | 0.822139  |
| O  | 2.233929  | 1.302678  | -0.001965 |



|   |          |          |          |
|---|----------|----------|----------|
| C | 1.596741 | 0.277771 | 0.003267 |
|---|----------|----------|----------|

70.3171

96.3350

240.7706

310.1398

343.1185

463.5900

536.2744

611.4812

666.1786

764.3639

859.4897

1233.8316

1734.5685

3705.3240

3770.8295

#### **TS4**

|   |          |           |          |
|---|----------|-----------|----------|
| H | 0.683258 | -1.416419 | 0.122741 |
|---|----------|-----------|----------|

|    |           |           |           |
|----|-----------|-----------|-----------|
| Pt | -0.319935 | -0.072491 | -0.015437 |
|----|-----------|-----------|-----------|

|   |           |          |           |
|---|-----------|----------|-----------|
| O | -2.241046 | 0.453404 | -0.039188 |
|---|-----------|----------|-----------|

|   |          |           |          |
|---|----------|-----------|----------|
| O | 1.999078 | -1.041587 | 0.045685 |
|---|----------|-----------|----------|

|   |           |          |          |
|---|-----------|----------|----------|
| H | -2.519986 | 0.577948 | 0.874691 |
|---|-----------|----------|----------|

|   |          |          |          |
|---|----------|----------|----------|
| O | 2.370296 | 1.207704 | 0.008439 |
|---|----------|----------|----------|

|   |          |          |          |
|---|----------|----------|----------|
| C | 1.627507 | 0.256095 | 0.014531 |
|---|----------|----------|----------|

1381.9569 i

103.2376

113.4419

331.8549

356.7774

429.5066

463.8905

520.7286

581.5357

725.6203

777.8244

1047.4032

1694.4445

1781.5688

3783.1647

**TS5**

|    |           |           |           |
|----|-----------|-----------|-----------|
| H  | 0.062639  | 1.264609  | -0.094221 |
| H  | -2.153771 | 0.710931  | 0.255057  |
| Pt | -0.769132 | -0.025312 | -0.023463 |
| O  | 1.924419  | 1.293073  | 0.081479  |
| O  | 3.184492  | -0.551267 | -0.202961 |
| O  | 1.054884  | -0.780563 | 0.297824  |
| C  | 2.128844  | 0.051469  | 0.043096  |

471.2550 i

112.8909

263.6227

318.7538

399.3498

490.8932

603.7800

647.0971

648.7645

774.0271

830.1510

1252.2342

1565.8938

2126.0741

2202.2640

**H<sub>2</sub>Pt(CO<sub>3</sub>)<sup>-</sup>**

|    |           |           |           |
|----|-----------|-----------|-----------|
| O  | 3.112883  | -0.082388 | -0.025024 |
| H  | -1.863537 | -0.993553 | -0.082625 |
| Pt | -0.652193 | 0.002479  | -0.016176 |
| O  | 1.079878  | -1.064997 | 0.085538  |
| O  | 1.189298  | 1.121361  | -0.000984 |
| C  | 1.899023  | 0.027120  | 0.018739  |
| H  | -1.716046 | 0.845699  | 0.755702  |

136.2691

308.0792

326.9868

425.2987

523.1408

607.5264

649.8193

729.1614  
823.3402  
840.2165  
949.7501  
1197.1508  
1697.6088  
2209.6779  
2239.7115

**H<sub>2</sub>O**

|   |           |           |           |
|---|-----------|-----------|-----------|
| O | -0.000000 | -0.000000 | 0.116933  |
| H | 0.000000  | 0.763545  | -0.467731 |
| H | -0.000000 | -0.763545 | -0.467731 |

1626.6809  
3798.5724  
3901.4499

**CO<sub>2</sub>**

|   |           |           |           |
|---|-----------|-----------|-----------|
| C | 0.000000  | 0.000121  | 0.000079  |
| O | 1.073146  | -0.240785 | 0.370166  |
| O | -1.073146 | 0.240695  | -0.370225 |

673.5954  
1369.2949  
2400.6521

**HPtOH<sup>-</sup>**

|    |           |           |           |
|----|-----------|-----------|-----------|
| Pt | 0.190942  | -0.002083 | 0.012709  |
| H  | 1.677165  | 0.167044  | -0.562822 |
| H  | -2.126870 | 0.800611  | 0.058763  |
| O  | -1.805469 | -0.100643 | -0.060902 |

398.4240  
510.6835  
556.6839  
752.5437  
2051.9129  
3762.3056

**PtCO<sub>2</sub><sup>-</sup>**

|    |           |           |           |
|----|-----------|-----------|-----------|
| Pt | -0.497553 | -0.037089 | 0.000000  |
| O  | 1.479956  | 1.260347  | 0.000004  |
| O  | 2.273962  | -0.900597 | 0.000005  |
| C  | 1.462963  | 0.002496  | -0.000015 |

228.4199

322.4901

596.7472

737.4369

1194.6430

1767.0122

**PtH**

|    |           |           |           |
|----|-----------|-----------|-----------|
| H  | -0.000000 | 0.000000  | -1.514187 |
| Pt | 0.000000  | -0.000000 | 0.019413  |

2319.0573

**PtOH**

|    |           |           |           |
|----|-----------|-----------|-----------|
| Pt | 0.010629  | -0.196242 | -0.000000 |
| O  | 0.010629  | 1.668115  | 0.000000  |
| H  | -0.914074 | 1.961945  | 0.000000  |

644.9714

932.8863

3704.7142

**HCO<sub>2</sub><sup>-</sup>**

|   |           |           |           |
|---|-----------|-----------|-----------|
| H | -0.000074 | 1.450772  | 0.000151  |
| O | -1.135840 | -0.209063 | 0.000020  |
| O | 1.135992  | -0.208983 | 0.000020  |
| C | -0.000191 | 0.315600  | -0.000080 |

744.2030

1041.8569

1338.0562

1370.8070

1649.1797

2573.5730

**HCO<sub>3</sub><sup>-</sup>**

|   |           |           |           |
|---|-----------|-----------|-----------|
| O | -1.047405 | -0.735745 | -0.000115 |
| O | -0.056482 | 1.294847  | -0.000020 |
| O | 1.201234  | -0.598868 | 0.000079  |
| C | 0.160080  | 0.063922  | -0.000083 |
| H | -1.739257 | -0.065399 | 0.000950  |

537.4675

546.0120

620.7137

819.7067

841.7805

1194.0776

1290.6578

1750.1819

3791.8956

**H<sub>2</sub>Pt**

|    |           |           |           |
|----|-----------|-----------|-----------|
| Pt | 0.027648  | 0.000000  | 0.000000  |
| H  | -1.078251 | -1.036534 | -0.000012 |
| H  | -1.078289 | 1.036498  | 0.000011  |

772.6400

2406.2237

2447.3742

**CO<sub>3</sub><sup>-</sup>**

|   |           |           |           |
|---|-----------|-----------|-----------|
| C | -0.000095 | -0.000228 | -0.001013 |
| O | 0.989427  | -0.760114 | 0.000262  |
| O | -1.153245 | -0.476394 | 0.000283  |
| O | 0.163889  | 1.236679  | 0.000215  |

282.8799

284.0133

768.0089

1140.2120

1518.1417

1518.7866

Table S1. VDEs (eV), intensities (arbitrary units), and FWHMs of considered species.

| Structure                                                                          | VDE to singlet | Intensity singlet | VDE to triplet | Intensity triplet | EA (to singlet) | EA (to triplet) | FWHM (singlet) | FWHM (triplet) |
|------------------------------------------------------------------------------------|----------------|-------------------|----------------|-------------------|-----------------|-----------------|----------------|----------------|
| 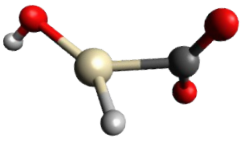  | 3.54           | 2.88              | 4.43           | 14.26             | 1.67            | 3.21            | 1.87           | 1.22           |
|   | 4.15           | 12.57             | 3.92           | 10.11             | 3.61            | 3.63            | 0.54           | 0.29           |
|   | 3.37           | 3.78              | 3.32           | 3.40              | 2.14            | 3.05            | 1.23           | 0.27           |
|  | 4.36           | 11.83             | 4.35           | 13.74             | 3.08            | 4.13            | 1.28           | 0.22           |
